# Supplementary material for: A new Cu-based system for formic acid dehydrogenation
Source: Royal Society of Chemistry journal article supplement (doi:10.1039/c4ra11031e), 2014-01-01
Supplement: c4ra11031e1.pdf [file c4ra11031e1.pdf]

## A new Cu-based system for formic acid dehydrogenation

Nicola Scotti<sup>[a]</sup>, Rinaldo Psaro<sup>[a]</sup>, Nicoletta Ravasio<sup>\*[a]</sup> and Federica Zaccheria<sup>[a]</sup>

---

Dr. N. Scotti, Dr. R. Psaro, Dr. N. Ravasio\*, Dr. F. Zaccheria  
Institute of Molecular Science and Technology  
CNR  
Via Golgi, 19, 20133 Milano (Italy)  
E-mail: n.ravasio@istm.cnr.it

### Supporting Information

#### *Catalytic test set-up*

The experiments were carried out in a 5 ml glass flask equipped with reflux condenser and connected to a gas burette as shown in Figure S1.

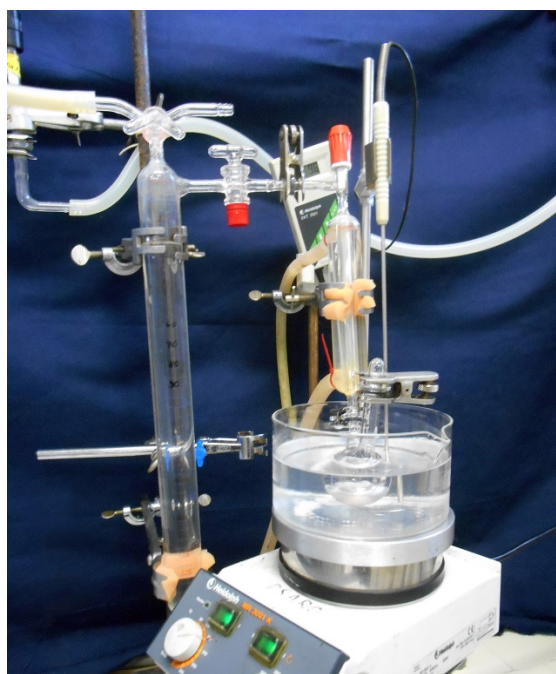

**Figure S1.** Experimental equipment

In a standard reaction, 28 mmol (1.31 g) of HCOOH were carefully mixed with the desired amount of the amine, then the mixture was pre-heated to the reaction temperature (95 °C, oil bath temperature) under N<sub>2</sub> atmosphere and stirring (1250 rpm). The copper catalysts was added to the reaction mixture thanks to a small glass crucible. The volume was measured thanks to the gas-burette and gases were analyzed by GC equipped by TCD (see further).

#### *Analysis of the gas mixture*

The gas produced was analyzed by GC (Agilent 6890N) equipped with a TCD detector and two columns: the first one (bonded, divinylbenzene/ethylene glycol dimethacrylate) for CO<sub>2</sub> detection and the second (19095P-MS0E molecular sieve) for H<sub>2</sub>, and CO detection and separation. The analysis was carried out with the following temperature ramp: 4 min at 40°C, heating at 10°/min till 100°C, 1 min at 100°C.

For the quantitative analysis an external calibration with three different standard mixtures was carried out. The chromatograms of reaction gas phase put in evidence that H<sub>2</sub> and CO<sub>2</sub> were produced in equal amount. The H<sub>2</sub>/CO<sub>2</sub> ratio were around 0.93-0.95 and this value is comparable to the one obtained in our hand with the already reported [ $\{\text{RuCl}_2(\text{p-cymene})\}_2$ ] (0.93)[ Beller et al. *Angew. Chem. Int. Ed.* 2008, 47, 3962–3965].

Traces of amine were detected by analysis of the gas phase with GCMS (GC Agilent 7890A – MS 5975C) equipped with a 5%-phenyl- methyl polysiloxane column

### Reaction Profiles

In Figure S2 are reported typical reaction profiles for the formic acid dehydrogenation using copper catalysts.

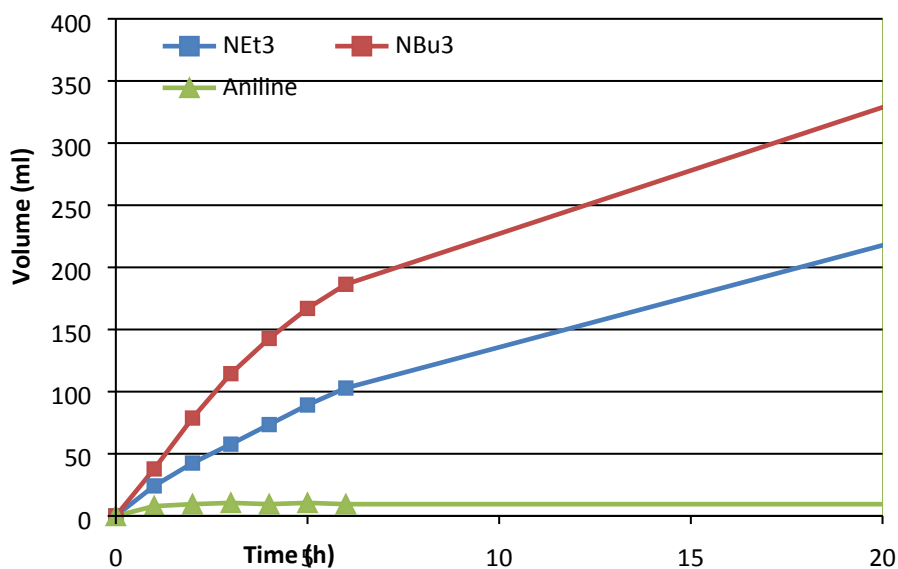

**Figure S2.** Reaction profile for NEt<sub>3</sub>, NBu<sub>3</sub> and aniline in the presence of Cu(OAc)<sub>2</sub> catalyst (conditions: Cat=0.26 mmol, 95°C, HCOOH=28 mmol, HCOOH/Amine=1)

Full catalytic results (volume, conversion and TON) at 3, 6 and 22 h

| Table S1. Decomposition of formic acid using different HCOOH/NEt <sub>3</sub> ratio and different Cu precursors |                              |        |     |      |       |      |                     |      |      |                     |     |      |                     |
|-----------------------------------------------------------------------------------------------------------------|------------------------------|--------|-----|------|-------|------|---------------------|------|------|---------------------|-----|------|---------------------|
| Cu precursor                                                                                                    | HCOOH/NEt <sub>3</sub> Ratio | V (ml) |     |      | C (%) |      |                     | TOF  |      |                     | TON |      |                     |
|                                                                                                                 |                              | 3 h    | 6 h | 22 h | 3 h   | 6 h  | 22 h                | 3 h  | 6 h  | 22 h                | 3 h | 6 h  | 22 h                |
| Cu(OAc) <sub>2</sub>                                                                                            | 5/2                          | 20     | 28  | 56   | 1.5   | 2.0  | 4.1                 | 0.53 | 0.37 | 0.20                | 1.6 | 2.2  | 4.4                 |
| Cu(OAc) <sub>2</sub>                                                                                            | 1/1                          | 58     | 103 | 234  | 4.2   | 7.6  | 17.2                | 1.53 | 1.37 | 0.85                | 4.6 | 8.2  | 18.6                |
| Cu(OAc) <sub>2</sub>                                                                                            | 2/5                          | 63     | 112 | 273  | 4.6   | 8.3  | 20.1                | 1.67 | 1.48 | 0.98                | 5.0 | 8.9  | 21.6                |
| Cu(OOCH) <sub>2</sub>                                                                                           | 1/1                          | 47     | 88  | 229  | 3.5   | 6.5  | 16.8                | 1.27 | 1.18 | 0.84                | 3.8 | 7.1  | 18.4                |
| Cu(acac) <sub>2</sub>                                                                                           | 1/1                          | 64     | 121 | 253  | 4.7   | 8.9  | 18.6                | 1.70 | 1.62 | 0.92                | 5.1 | 9.7  | 20.3                |
| Cu(NO <sub>3</sub> ) <sub>2</sub>                                                                               | 1/1                          | 66     | 116 | 231  | 4.8   | 8.5  | 17.0                | 1.77 | 1.57 | 0.85                | 5.3 | 9.4  | 18.6                |
| CuCl <sub>2</sub>                                                                                               | 1/1                          | 17     | 26  | 71   | 1.2   | 1.9  | 5.2                 | 0.43 | 0.35 | 0.26                | 1.3 | 2.1  | 5.7                 |
| CuCl                                                                                                            | 1/1                          | 32     | 59  | 189  | 2.3   | 4.3  | 14.9                | 0.83 | 0.77 | 0.68                | 2.5 | 4.6  | 14.9                |
| CuO                                                                                                             | 1/1                          | 47     | 66  | 249  | 3.5   | 7.3  | 19.6                | 1.23 | 1.32 | 0.89                | 3.7 | 7.9  | 19.6                |
| Cu <sub>2</sub> O                                                                                               | 1/1                          | 79     | 124 | 217  | 5.8   | 9.1  | 16.0                | 2.10 | 1.67 | 0.80                | 6.3 | 10.0 | 17.5                |
| CuI                                                                                                             | 1/1                          | 110    | 209 | 493  | 13.0  | 15.4 | 36.2<br>(45h =66.0) | 2.93 | 2.78 | 1.80<br>(45h =1.60) | 8.8 | 16.7 | 39.5<br>(45h =72.0) |
| Stryker                                                                                                         | 1/1                          | 28     | 47  | 59   | 2.1   | 3.5  | 4.3                 | 0.77 | 0.63 | 0.21                | 2.3 | 3.8  | 4.7                 |
| Cu powder                                                                                                       | 1/1                          | 8      | 9   | 21   | 0.6   | 0.7  | 1.5                 | 0.23 | 0.13 | 0.08                | 0.7 | 0.8  | 1.7                 |

Reaction conditions: Cu=0.26 mmol, 95 °C, HCOOH=28 mmol (1.31 g)

| Table S2. Decomposition of formic acid with Cu(OAc) <sub>2</sub> using different amines: effect of basicity |                     |        |     |      |       |      |      |      |      |      |      |      |      |
|-------------------------------------------------------------------------------------------------------------|---------------------|--------|-----|------|-------|------|------|------|------|------|------|------|------|
| Amine                                                                                                       | pK <sub>b</sub>     | V (ml) |     |      | C (%) |      |      | TOF  |      |      | TON  |      |      |
|                                                                                                             |                     | 3 h    | 6 h | 22 h | 3 h   | 6 h  | 22 h | 3 h  | 6 h  | 22 h | 3 h  | 6 h  | 22 h |
| Dibutylamine                                                                                                | 2.75                | 53     | 94  | 221  | 3.9   | 6.9  | 16.2 | 1,40 | 1,23 | 0,80 | 4.2  | 7.4  | 17.5 |
| Piperidine                                                                                                  | 2.88                | 59     | 99  | 164  | 4.3   | 7.3  | 12.0 | 1,57 | 1,30 | 0,59 | 4.7  | 7.8  | 13.0 |
| Triethylamine                                                                                               | 2.99                | 58     | 103 | 234  | 4.2   | 7.6  | 17.2 | 1,27 | 1,18 | 0,84 | 3.8  | 7.1  | 18.4 |
| Tributylamine                                                                                               | 3.11                | 115    | 186 | 349  | 8.4   | 13.7 | 25.6 | 3,03 | 2,47 | 1,26 | 9.1  | 14.8 | 27.7 |
| Ethylendiamine                                                                                              | 3.29 <sup>[a]</sup> | 8      | 8   | 8    | 0.6   | 0.6  | 0.6  | 0,20 | 0,10 | 0,03 | 0.6  | 0.6  | 0.6  |
| Tripropylamine                                                                                              | 3.35                | 160    | 241 | 312  | 11.7  | 17.7 | 22.9 | 4,23 | 3,18 | 1,13 | 12.7 | 19.1 | 24.8 |
| Benzylamine                                                                                                 | 4.67                | 13     | 17  | 28   | 0.9   | 1.2  | 2.1  | 0,33 | 0,22 | 0,10 | 1.0  | 1.3  | 2.2  |
| Pyridine                                                                                                    | 8.75                | 24     | 26  | 28   | 1.8   | 1.9  | 2.1  | 0,63 | 0,35 | 0,10 | 1.9  | 2.1  | 2.3  |
| Aniline                                                                                                     | 9.37                | 11     | 10  | 10   | 0.8   | 0.8  | 0.7  | 0,27 | 0,13 | 0,04 | 0.8  | 0.8  | 0.8  |
| Diphenylamine                                                                                               | 13.21               | 4      | 5   | 5    | 0.3   | 0.4  | 0.4  | 0,10 | 0,07 | 0,02 | 0.3  | 0.4  | 0.4  |

Reaction conditions: Cat=0.26 mmol, 95 °C, HCOOH=28 mmol (1.31 g, 99 wt%), HCOOH/Amine=1; [a] pK<sub>b1</sub>

**Table S3.** Stabilization of Cu catalyst using stoichiometric amount of Ethylenediamine or TMEDA

| Cu/en Ratio  | 3 h    |       |      |     | 6 h    |       |      |      | 22 h   |       |      |      |
|--------------|--------|-------|------|-----|--------|-------|------|------|--------|-------|------|------|
|              | V (ml) | C (%) | TOF  | TON | V (ml) | C (%) | TOF  | TON  | V (ml) | C (%) | TOF  | TON  |
| Cu/en=1/2    | 60     | 4.4   | 1.57 | 4.7 | 105    | 7.7   | 1.38 | 8.3  | 234    | 17.2  | 0.84 | 18.5 |
| Cu/en=1/1    | 121    | 8.9   | 3.20 | 9.6 | 189    | 13.9  | 2.50 | 15.0 | 299    | 22.0  | 1.08 | 23.8 |
| Cu/en=2/1    | 59     | 4.3   | 1.57 | 4.7 | 98     | 7.2   | 1.30 | 7.8  | 223    | 16.4  | 0.80 | 17.7 |
| Cu/TMEDA=1/1 | 70     | 5.2   | 1.87 | 5.6 | 111    | 8.2   | 1.47 | 8.8  | 224    | 16.4  | 0.80 | 17.7 |

Reaction conditions: Cu(OAc)<sub>2</sub>=0.26 mmol, 95 °C, HCOOH=28 mmol (1.31 g, 99 wt%), HCOOH/NEt<sub>3</sub>=1

*Comparison of TONs with the literature*

| Catalyst                                                                             | TON (3h) | Ref                                          |
|--------------------------------------------------------------------------------------|----------|----------------------------------------------|
| CuI                                                                                  | 9        | <i>This paper</i>                            |
| Cu(OAc) <sub>2</sub> +en (1/1)                                                       | 10       | <i>This paper</i>                            |
| [Fe(BF <sub>4</sub> ) <sub>2</sub> ].6H <sub>2</sub> O/ PPh <sub>3</sub> (no amine)  | 825      | <i>Science, 2011, 333, 1733</i>              |
| [Fe(BF <sub>4</sub> ) <sub>2</sub> ].6H <sub>2</sub> O/ 2PPh <sub>3</sub> (no amine) | 1942     | <i>Science, 2011, 333, 1733</i>              |
| RuCl <sub>2</sub> (PPh <sub>3</sub> ) <sub>3</sub>                                   | 905      | <i>Angew. Chem. Int. Ed, 2008, 47, 3962</i>  |
| Fe <sub>3</sub> (CO) <sub>12</sub> UV light                                          | 292      | <i>Angew. Chem. Int. Ed., 2010, 49, 8993</i> |
| RuBr <sub>3</sub> .xH <sub>2</sub> O                                                 | 1475     | <i>ChemSusChem, 2008, 1, 751</i>             |
| [RuCl <sub>2</sub> (Benzene)] <sub>2</sub> /40 PPh <sub>3</sub>                      | 505      | <i>Tetrah. Lett., 2009, 50, 1603</i>         |
